# Supplementary material for: Aquaporin-facilitated water uptake in barley (Hordeum vulgare L.) roots
Source: PubMed Central journal article supplement — J Exp Bot. 2011 Mar 25;62(12):4115–26. doi: 10.1093/jxb/err075 (PMC3153672; doi:10.1093/jxb/err075), 2011-03-25
Supplement: supp_err075_00058065-file001.pdf [file supp_err075_00058065-file001.pdf]

# Aquaporin-facilitated water uptake in barley (*Hordeum vulgare* L.) roots

Thorsten Knipfer<sup>1</sup>, Matthieu Besse<sup>1</sup>, Jean-Luc Verdeil<sup>2</sup> and Wieland Fricke<sup>1</sup>,

## Supplementary File S1

### Methodological details of hydraulic measurements

#### Root exudation experiments

For measurements of individual roots, seminal and adventitious roots were excised at the base under water and inserted at their base about 10 mm into a glass capillary ( $\phi = 0.55$  mm) and sealed to the capillary with a drop of super glue. The rise of xylem sap in the capillary was recorded at time intervals of 5 min for one hour. Exudate was stored under liquid paraffin in microcentrifuge tubes in the freezer, and analysed within days for osmolality using picolitre osmometry (Fricke and Peters, 2002). Osmotic flow rates ( $Q_r^{os}$ ) were calculated from the linear part of the flow *versus* time plots. The driving force was the difference in osmotic pressure ( $\Delta\pi$ , MPa) between root xylem ( $\pi_{xylem}$ ) and medium ( $\pi_{medium}$ ) multiplied by the corresponding reflection coefficient for solutes ( $\sigma = 1.0$ ; Knipfer and Fricke, 2010a). Root hydraulic conductivity was calculated as follows:

$$Lp_r = \frac{Q_r^{os}}{A_r \cdot \sigma \cdot (\pi_{xylem} - \pi_{medium})}. \quad (\text{Eqn 1})$$

Treating the root as a cylinder, the total surface area of root(s) ( $A_r$ ) was determined by measuring the length ( $l$ ) and radius ( $r$ ) of the main axis of roots and the number ( $n_{lateral}$ ), length ( $l_{lateral}$ ), and radius ( $r_{lateral}$ ) of lateral roots, when present:

$$A_r = (2\pi \cdot l \cdot r) + n_{lateral} \cdot (2\pi \cdot l_{lateral} \cdot r_{lateral}) \quad (\text{Eqn 2})$$

The surface area  $A_r$  of the entire root system was the sum of  $A_r$ s of individual roots.

### Cell pressure probe experiments

Hydraulic analyses of cortical cells were performed with the cell pressure probe on seminal and adventitious roots of intact plants. Roots were bathed in nutrient solution used for growing plants. When cortex cells were punctured with the silicon oil filled glass capillary of the cell pressure probe a meniscus formed between cell sap and silicon oil. By turning the micrometer screw with the aid of a motor, the meniscus was pushed back to the root surface and kept there at a constant position. When an equilibrium cell turgor pressure had been maintained for 1-3 min, hydrostatic pressure relaxations were induced through rapid pressure pulses ( $\Delta P \approx 0.15$  MPa). The resulting half-times ( $T_{1/2c}$ ) of pressure relaxations were used to calculate cell hydraulic conductivity ( $Lp_c$ ) (Eqn 3). For each cell, between 4-10 pressure relaxations were induced.

$$Lp_c = \frac{V}{A} \cdot \frac{\ln(2)}{T_{1/2c}} \cdot \frac{1}{(\varepsilon_c + \pi_c)} \quad (\text{Eqn 3})$$

where  $V$  = cell volume,  $A$  = cell surface area,  $\pi_c$  = osmotic pressure of cell sap ( $\approx$  cell turgor pressure), and  $\varepsilon_c$  = cell elastic modulus. Cell dimensions (length and diameter) of the 1<sup>st</sup> to 4<sup>th</sup> cortical cell layer were determined from free hand cross- and longitudinal-sections, using a calibrated stereomicroscope (40x magnification). For the calculation of  $\varepsilon_c$ , known changes in cell volume ( $\Delta V$ ) were induced by moving the cell sap/silicon oil meniscus between two reference points along the microcapillary. The microcapillary was calibrated through separate experiments by expelling water contained between the two reference points into liquid paraffin and calculating the volume of water droplet from its diameter. Cell elastic modulus was calculated from  $\Delta V$  and associated changes in pressure ( $\Delta P$ ) according to:

$$\varepsilon = V \cdot \frac{\Delta P}{\Delta V} \quad (\text{Eqn 4})$$

$\Delta V$  ranged between  $7 \times 10^{-14}$  to  $18 \times 10^{-14} \text{ m}^3$  depending on the capillaries used. When  $T_{1/2c}$  was in the sub-second range, the measured cell elastic modulus ( $\epsilon_c$ ) was corrected for fast water flow, and the corrected  $\epsilon_c^*$  used for calculating  $Lp_c$  (Volkov *et al.*, 2007):

$$\epsilon_c^* = \epsilon_c \cdot \frac{\ln(2) \cdot t \cdot T_{1/2c}^{-1}}{1 - \exp^{-\ln(2) \cdot t \cdot T_{1/2c}^{-1}}} \quad (\text{Eqn 5})$$

## Transpiration measurements

Transpiration rate was determined gravimetrically for intact plants in the growth chamber. Single barley plants were fixed in a measuring cylinder filled with nutrient solution and placed on a balance (CP323, Sartorius, Göttingen, Germany). Changes in weight of the cylinder were recorded at 2 min intervals using computer software (sartoCollect 1.0, Sartorius, Göttingen, Germany). Transpirational water loss ( $\text{m}^3$ ) was equivalent to the weight loss (g) recorded, minus the weight loss which was due to evaporational water loss from the solution surface of the measuring cylinder. The latter was determined through separate experiments and accounted for less than 5 % of total water loss. At the end of each transpiration measurement, leaf surface area was determined. Transpiration rates were expressed in  $\text{m}^3 \text{ m}^{-2} \text{ s}^{-1}$  by relating volume flow rates ( $\text{m}^3 \text{ s}^{-1}$ ) to total leaf surface area ( $\text{m}^2$ , sum of upper and lower leaf surface area).

## Supplementary Table S1

**Table S1.** Summary of a selection of studies, which examined the effect of mercury chloride ( $\text{HgCl}_2$ ) as an aquaporin (AQP) inhibitor on cell-, root-, and whole-plant-hydraulics. Recovery was measured using a reducing agent (e.g.  $\beta$ -mercapthoethanol, ME). ABA = Abscisic acid,  $g_s$  = stomata conductance,  $J_{vr}$  = root water flux,  $Lp_r$  = root hydraulic conductivity,  $Lp_c$  = cell hydraulic conductivity,  $P_f$  = osmotic water permeability,  $T_r$ , transpiration rate. Please note that while this is a comprehensive list, it may not be an exhaustive list.

| Study                       | Species                                | HgCl <sub>2</sub> -treated plant organ or cell | Control parameter measured                                                                                                 | HgCl <sub>2</sub> -treated, % of control (conc.) | Recovery, % of control (Agent, conc.)                   | Conclusions and additional information obtained during HgCl <sub>2</sub> treatment                                                               |
|-----------------------------|----------------------------------------|------------------------------------------------|----------------------------------------------------------------------------------------------------------------------------|--------------------------------------------------|---------------------------------------------------------|--------------------------------------------------------------------------------------------------------------------------------------------------|
| Maggio and Joly, 1995       | Tomato ( <i>Solanum lycopersicum</i> ) | Root-system                                    | $Lp_r = 4.6 \times 10^{-7} \text{ m s}^{-1} \text{ MPa}^{-1}$                                                              | 43% (500 $\mu\text{M}$ )                         | 80% ( $\beta$ -ME, 60 mM)                               | Inhibition of AQP mediated transmembrane water flow; no effect on $\text{K}^+$ concentration of xylem exudate.                                   |
| Tazawa <i>et al.</i> , 1997 | Barley ( <i>Hordeum vulgare</i> )      | Individual root                                | $Lp_r = 0.027 \text{ pm s}^{-1} \text{ Pa}^{-1}$                                                                           | 8-17% (100 $\mu\text{M}$ )                       | 60% ( $\beta$ -ME, 10 mM)                               | Barley roots highly $\text{Hg}^{2+}$ -sensitive; AQPs provide most conductive pathway of osmotic water transport.                                |
| Wan and Zwiazek, 1999       | Aspen ( <i>Populus tremuloides</i> )   | Root-system                                    | $J_{vr} = 1.8 \times 10^{-8} \text{ m}^3 \text{ m}^{-2} \text{ s}^{-1}$ ,<br>$g_s = 23 \text{ mmol m}^{-2} \text{ s}^{-1}$ | 47% (0.1 mM),<br>30% (0.1 mM)                    | 91% ( $\beta$ -ME, 50 mM),<br>48% ( $\beta$ -ME, 50 mM) | Intact, $\text{Hg}^{2+}$ treated roots trigger stomatal closure, most likely via ABA; $g_s$ not affected by $\text{Hg}^{2+}$ with excised roots. |
| Zhang and Tyerman, 1999     | Wheat ( <i>Triticum aestivum</i> )     | Root cortical cells                            | $Lp_c = 5.6 \times 10^{-7} \text{ m s}^{-1} \text{ MPa}^{-1}$                                                              | 25% (100 $\mu\text{M}$ )                         | 60% ( $\beta$ -ME, 5 mM)                                | Inhibition of AQPs of wheat cortex cells; $\text{HgCl}_2$ causes depolarization of membrane; no effect                                           |

|                                |                                    |                                                              |                                                                                                                                                                                                                                         |                                        |                                                 |                                                                                                                                                                                                                                                                                                                               |
|--------------------------------|------------------------------------|--------------------------------------------------------------|-----------------------------------------------------------------------------------------------------------------------------------------------------------------------------------------------------------------------------------------|----------------------------------------|-------------------------------------------------|-------------------------------------------------------------------------------------------------------------------------------------------------------------------------------------------------------------------------------------------------------------------------------------------------------------------------------|
|                                |                                    |                                                              |                                                                                                                                                                                                                                         |                                        |                                                 | of K <sup>+</sup> channel blocker TEA on Lp <sub>c</sub> .                                                                                                                                                                                                                                                                    |
| Hukin <i>et al.</i> , 2002     | Maize ( <i>Zea mays</i> )          | Root cortical cells                                          | Lp <sub>c</sub> = 1.8x10 <sup>-7</sup> m s <sup>-1</sup> MPa <sup>-1</sup>                                                                                                                                                              | 40% (20 μM)                            | 56% (β-ME, 5 mM)                                | Lp <sub>c</sub> in root elongation zone unaffected, but reduced in older root regions.                                                                                                                                                                                                                                        |
| Hachez <i>et al.</i> , 2006    | Maize ( <i>Zea mays</i> )          | Isolated root protoplasts                                    | P <sub>f</sub> = 10.5 μm s <sup>-1</sup>                                                                                                                                                                                                | 33% (250 μM)                           | - (not tested)                                  | Reduction in P <sub>f</sub> by Hg <sup>2+</sup> in root-hair zone; high P <sub>f</sub> related to increased <i>ZmPIP</i> expression.                                                                                                                                                                                          |
| Beaudette <i>et al.</i> , 2007 | Pea ( <i>Pisum sativum</i> )       | Individual root                                              | Lp <sub>r</sub> = 790 μl min <sup>-1</sup> MPa <sup>-1</sup> , T <sub>r</sub> = n.d                                                                                                                                                     | 50% (1-100 μM), 53-100% (1-100 μM)     | - (not tested), - (not tested)                  | Changes in Lp <sub>r</sub> correlated with <i>PsPIP2s</i> expression; AQP-blockage by Hg <sup>2+</sup> accompanied by increase in <i>PsPIP2;1</i> expression; no relation between Hg <sup>2+</sup> -treated roots and reduction in T <sub>r</sub> caused by ABA.                                                              |
| Bramley <i>et al.</i> , 2009   | Wheat ( <i>Triticum aestivum</i> ) | Root-system,<br>Individual root,<br>Root cortical cells      | Lp <sub>r</sub> = 7x10 <sup>-8</sup> m s <sup>-1</sup> MPa <sup>-1</sup> ,<br>Lp <sub>r</sub> = 12x10 <sup>-8</sup> m s <sup>-1</sup> MPa <sup>-1</sup> ,<br>Lp <sub>c</sub> = 1.7x10 <sup>-6</sup> m s <sup>-1</sup> MPa <sup>-1</sup> | 70% (50 μM), 50% (50 μM), 23% (50 μM)  | - (not tested), - (not tested), - (not tested)  | HgCl <sub>2</sub> treatments demonstrate localised influences of AQPs on root hydraulics (root <i>versus</i> cell level); Lp <sub>c</sub> largely controlled by AQPs.                                                                                                                                                         |
| SUMMARY                        | Several species                    | Individual root cells (protoplasts) to intact roots-systems. | Root level (Lp <sub>r</sub> ),<br>Cell level (Lp <sub>c</sub> )                                                                                                                                                                         | 8-50% (1-500 μM)<br>23-40% (20-100 μM) | 60-91% (β-ME, 10-60 mM),<br>56-60% (β-ME, 5 mM) | AQPs mediate transmembrane water flow; changes in Lp can correlate with PIP expression; stomata closure after HgCl <sub>2</sub> treatment of roots may be triggered by ABA; depolarization of membrane potential does not alter xylem K <sup>+</sup> concentration; inhibition of K <sup>+</sup> channels does not affect Lp. |

## Supplementary Figure S1

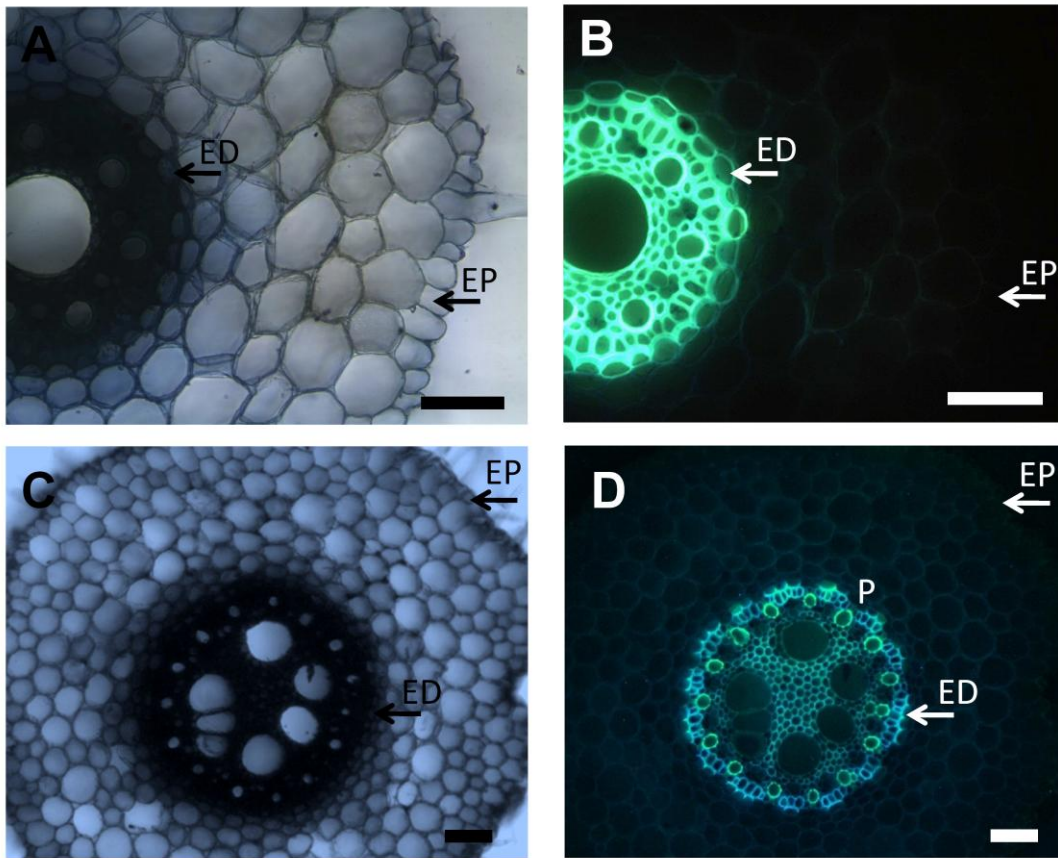

**Figure S1.** Cross-sections of seminal and adventitious roots of hydroponically grown barley plants highlighting the absence of an exodermis. Free-hand cross-sections were taken 1-2 cm below the root-shoot junction corresponding to the most mature root region. Sections were stained with berberine-hemisulfate and counterstained with toluidine blue and viewed under (A,C) bright light and (B,D) fluorescence light (excitation wavelength 390-420 nm) to visualize Casparian bands and the developmental state of endo- and exodermis (Knipfer and Fricke, 2011). The endodermis (ED) of (A,B) seminal and (C,D) adventitious roots shows asymmetrically thickened cell walls (state III of endodermis development including Casparian bands; Knipfer and Fricke, 2011), except in passage cells (P) opposite of xylem pools of adventitious roots. In seminal and adventitious roots an exodermis did not develop, which is usually located beneath the epidermis (EP). Scale bar (A,B) = 55  $\mu\text{m}$ , (C,D) = 75  $\mu\text{m}$ .
